# Supplementary material for: Paleozoic–Mesozoic Eustatic Changes and Mass Extinctions: New Insights from Event Interpretation
Source: MDPI journal article supplement (doi:10.3390/life10110281), 2020-11-14
Supplement: s1 [file s1]

Supplemental Material

# Paleozoic–Mesozoic Eustatic Changes and Mass Extinctions: New Insights from Event Interpretation

Dmitry A. Ruban

K.G. Razumovsky Moscow State University of Technologies and Management (the First Cossack University), Zemlyanoy Val Street 73, Moscow 109004, Russia; ruban-d@mail.ru

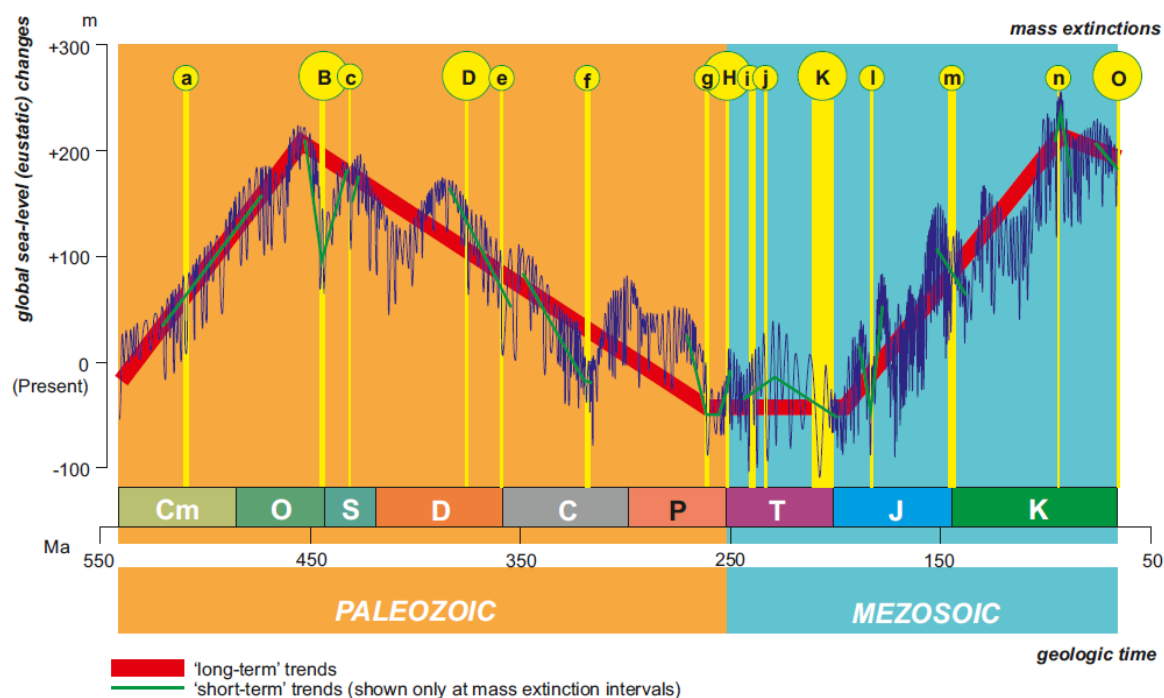

**Figure S1.** The Paleozoic-Mesozoic eustatic fluctuations, their trends, and mass extinctions (see text for more information).

**Publisher's Note:** MDPI stays neutral with regard to jurisdictional claims in published maps and institutional affiliations.

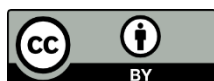

© 2020 by the authors. Submitted for possible open access publication under the terms and conditions of the Creative Commons Attribution (CC BY) license (<http://creativecommons.org/licenses/by/4.0/>).
